# Supplementary material
Source: ML conference proceedings conference paper supplement (https://openaccess.thecvf.com/content/WACV2024/html/Karthikeyan_AvatarOne_Monocular_3D_WACV_2024_paper.html)
Supplement: Supplementary file 1 [file Karthikeyan_AvatarOne_Monocular_3D_WACV_2024_supplemental.zip]

Archive with 2 entries (2 files):
- 2126-supp.mp4
- 2126-supp.pdf
